# Supplementary material for: Water-soluble nano-fluorogens fabricated by self-assembly of bolaamphiphiles bearing AIE moieties: towards application in cell imaging
Source: Royal Society of Chemistry journal article supplement (doi:10.1039/c4tb01546k), 2014-11-19
Supplement: c4tb01546k1.pdf [file c4tb01546k1.pdf]

# Water-soluble nano-fluorogens fabricated by self-assembly of bolaamphiphiles bearing AIE moieties: towards the application in cell imaging

Yijun Xia,<sup>a</sup> Lin Dong,<sup>b</sup> Yingzhi Jin,<sup>a</sup> Shuai Wang,<sup>a</sup> Li Yan,<sup>a</sup> Shouchun Yin,<sup>\*b</sup> Shixin Zhou,<sup>\*c</sup> Bo Song<sup>\*a</sup>

<sup>a</sup> Suzhou Key Laboratory of Macromolecular Design and Precision Synthesis, Jiangsu Key Laboratory of Advanced Functional Polymer Design and Application, College of Chemistry, Chemical Engineering and Materials Science, Soochow University, Suzhou 215123, China. E-mail: songbo@suda.edu.cn

<sup>b</sup> College of Material Chemistry and Chemical Engineering, Hangzhou Normal University, Hangzhou 310036, China.

<sup>c</sup> Department of Cell Biology, School of Basic Medicine, Peking University Health Science Center, Beijing 100191, China.

## <sup>1</sup>H NMR spectrum of TPE-11

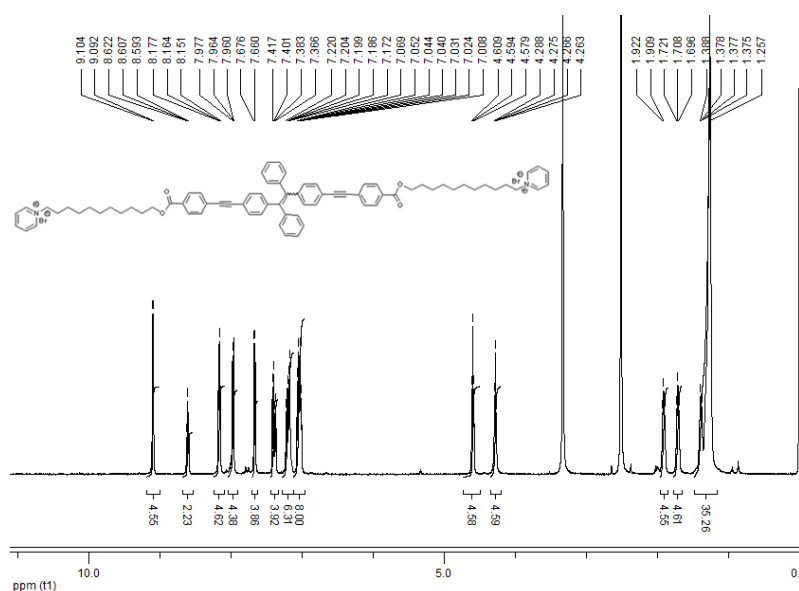

Fig. S1 500MHz <sup>1</sup>H NMR spectrum of TPE-11 in DMSO-d<sub>6</sub>
